# Supplementary material for: USP10 deubiquitinates RUNX1 and promotes proneural-to-mesenchymal transition in glioblastoma
Source: PubMed Central journal article supplement (PMC10033651; doi:10.1038/s41419-023-05734-y), 2023-03-22

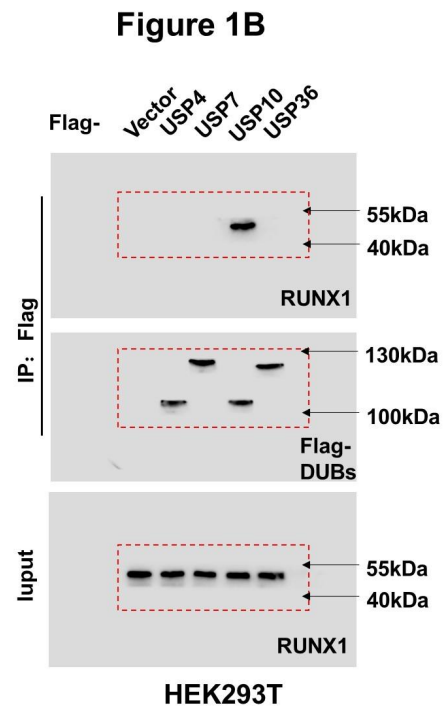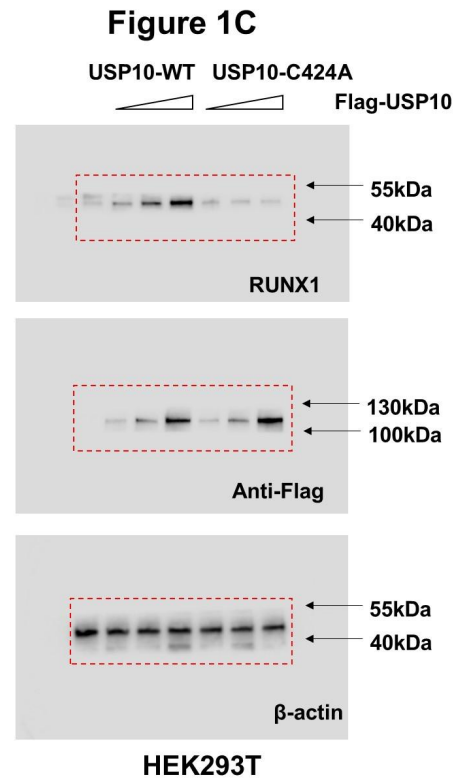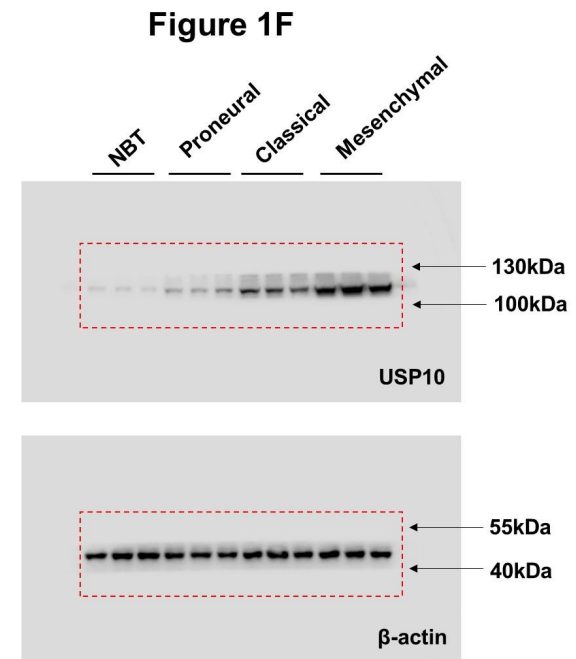

Figure 1G

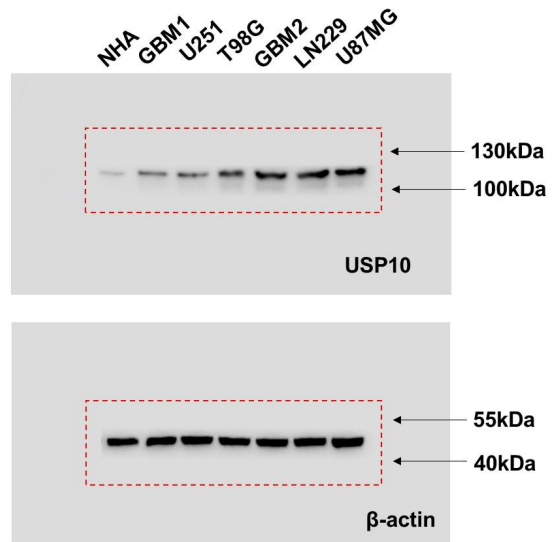

Figure 1H

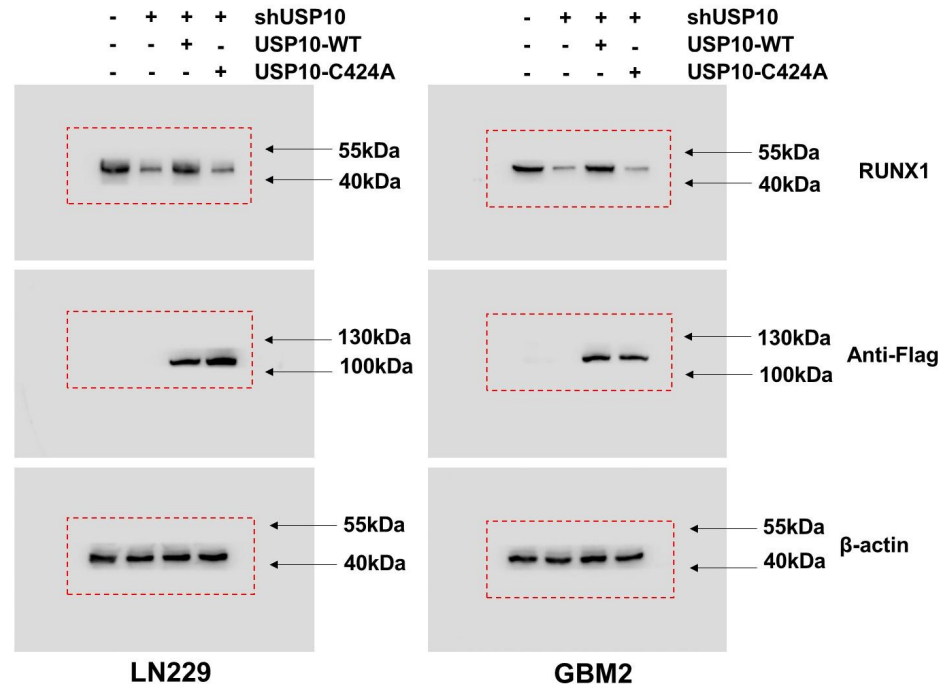

**Figure 2A**

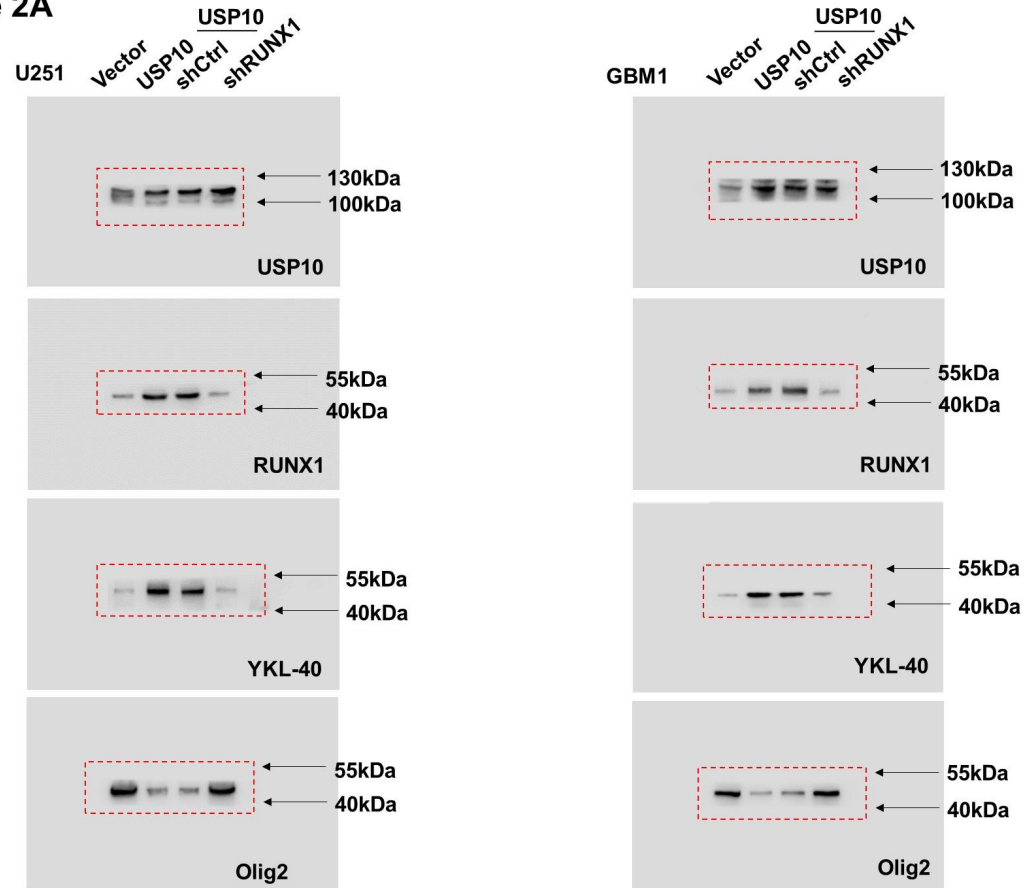

**Figure 2A**

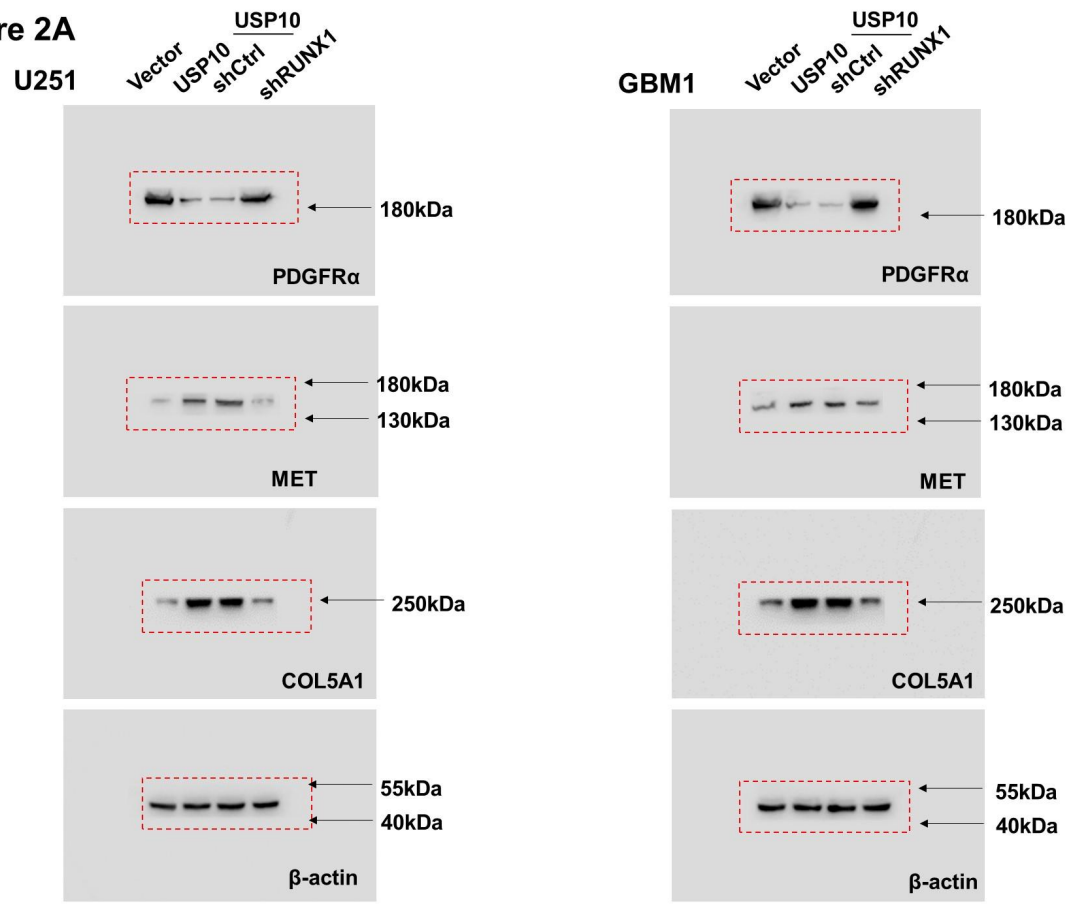

**Figure 3A**

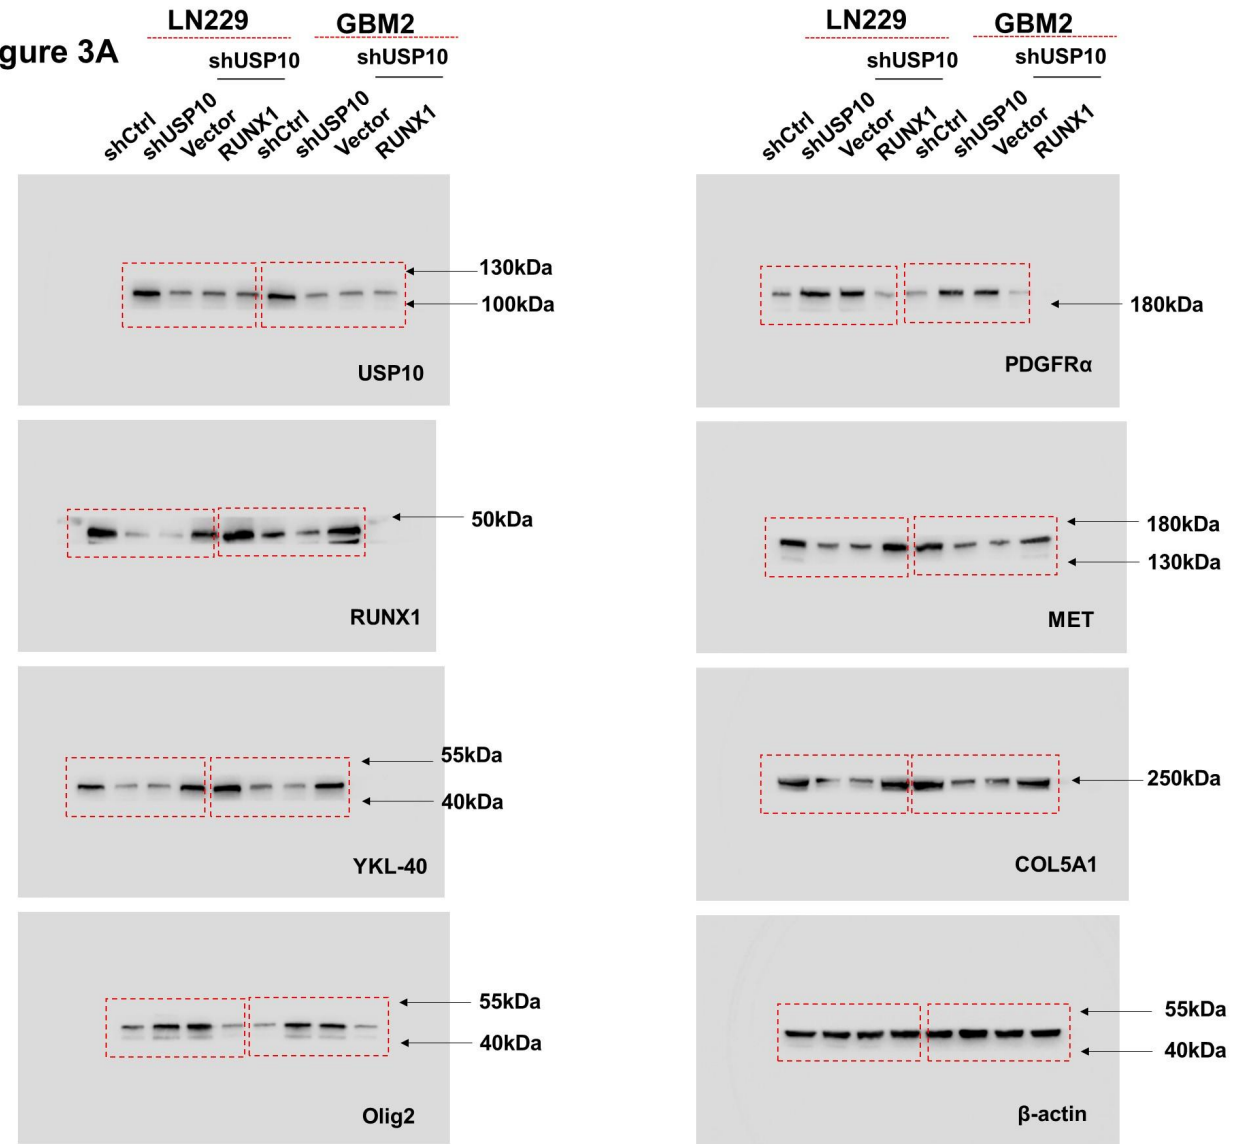

Figure 4A

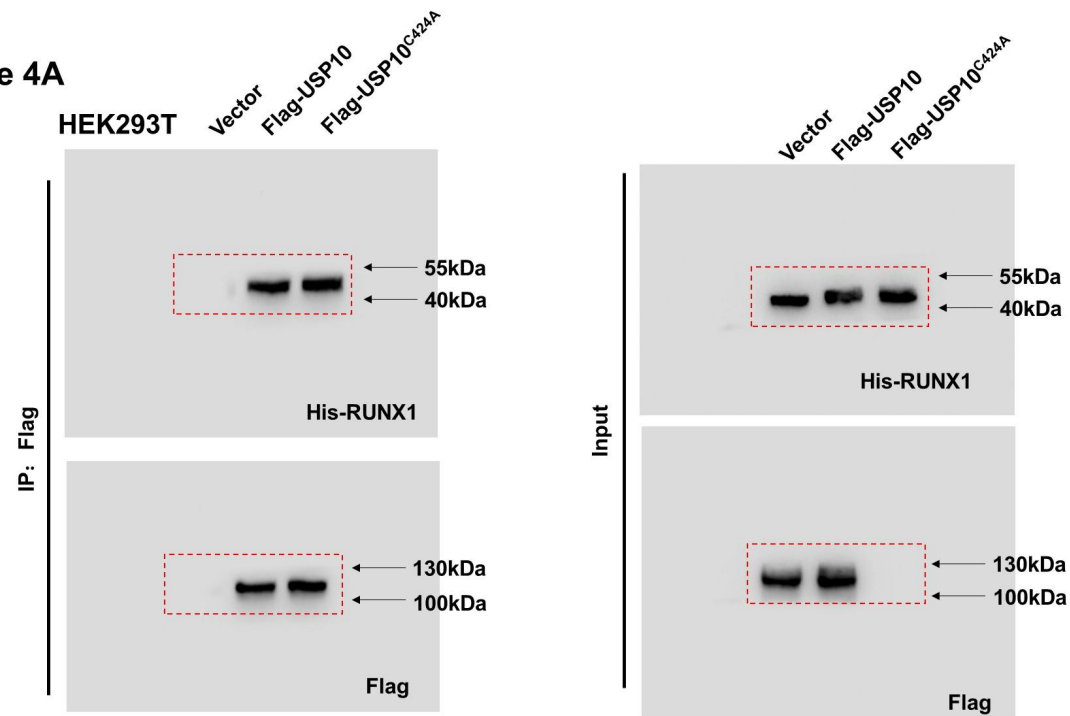

Figure 4B

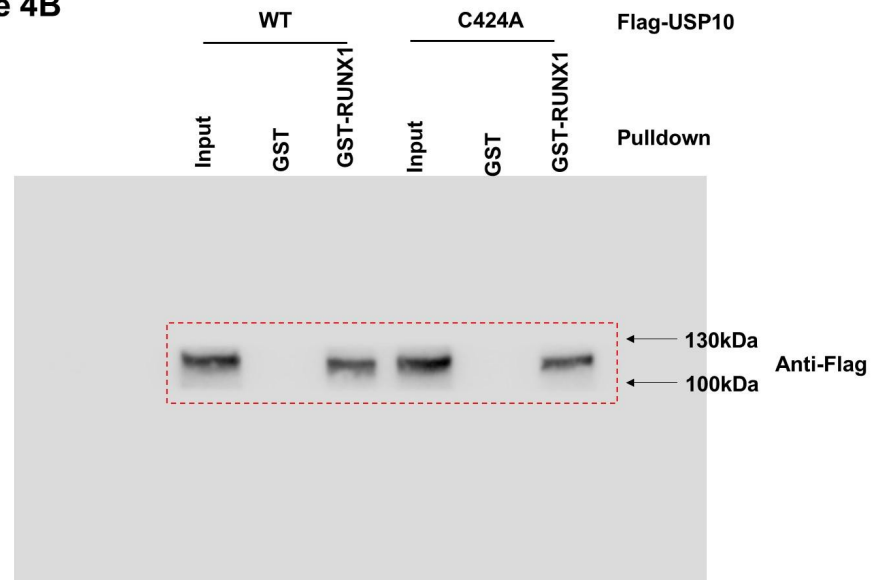

Figure 4D

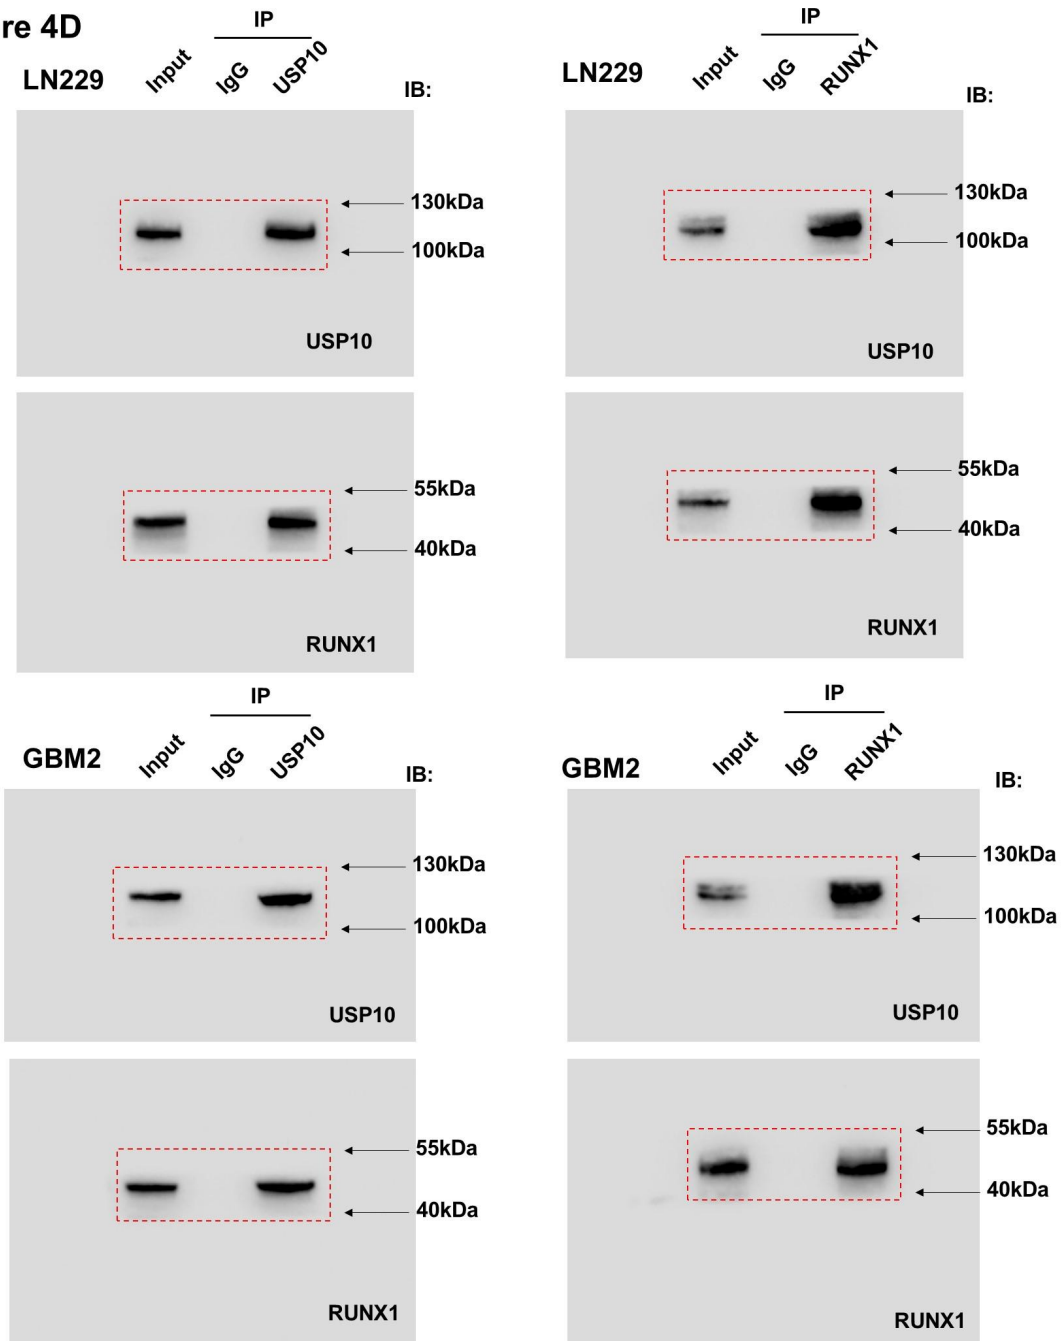

**Figure 4F**

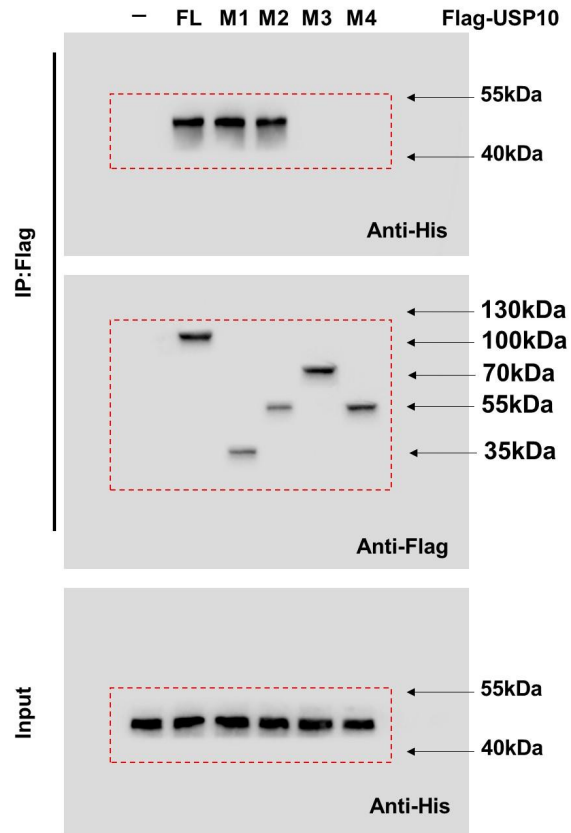

**Figure 4G**

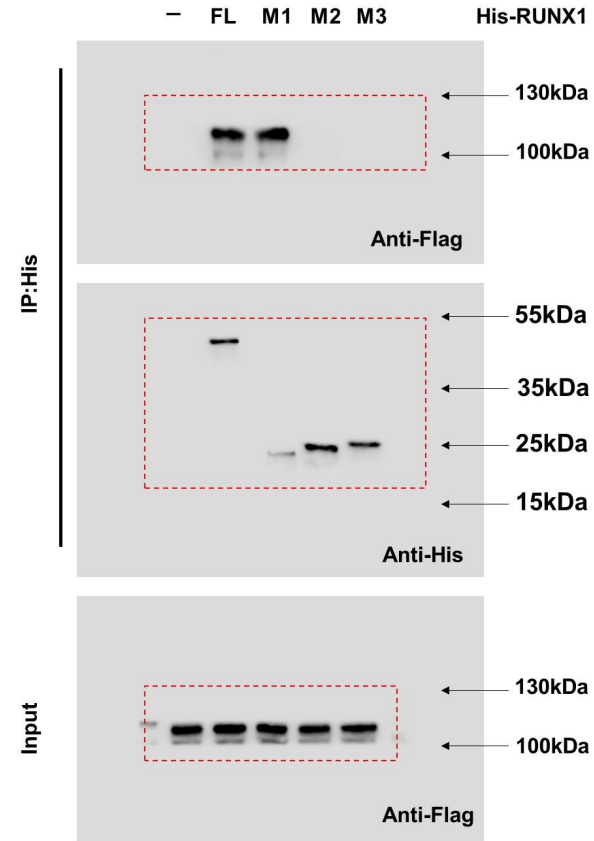



Figure 5A

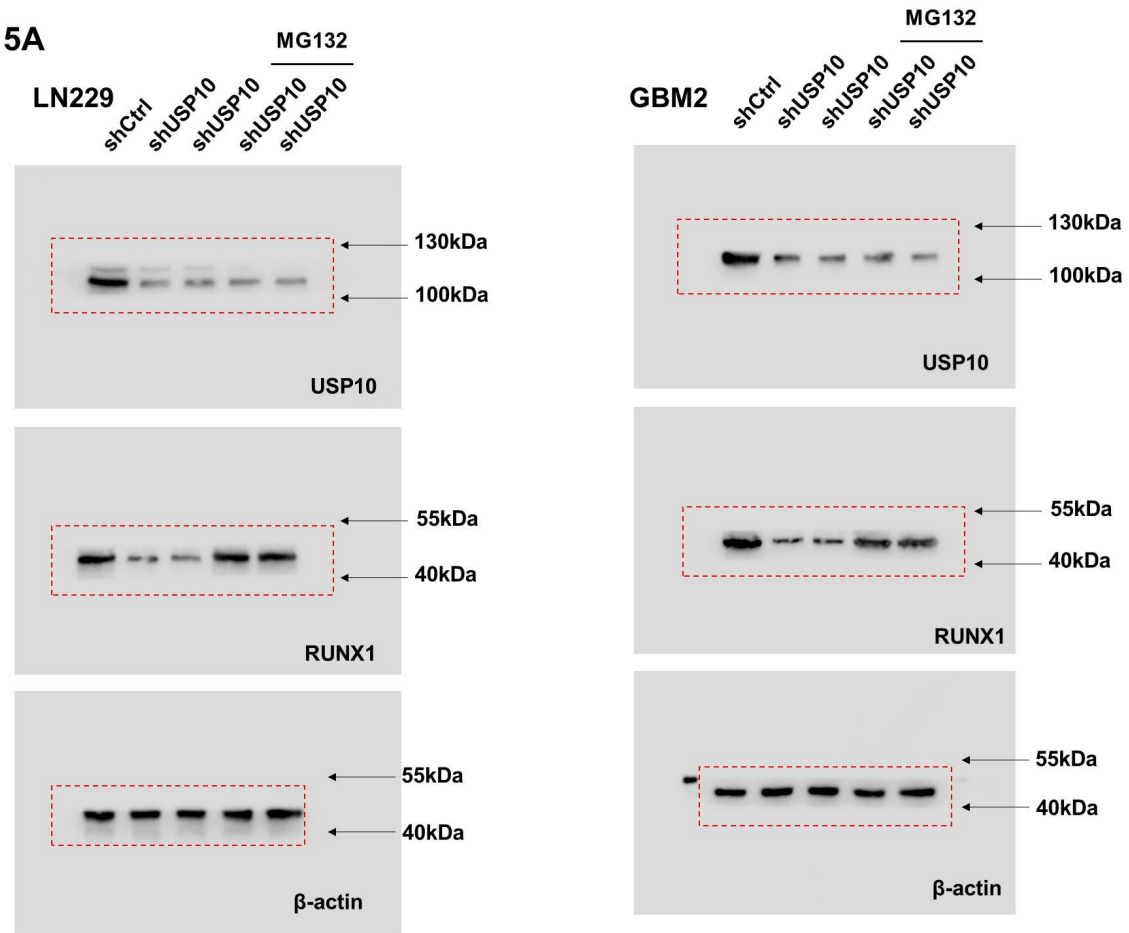

**Figure 5B**

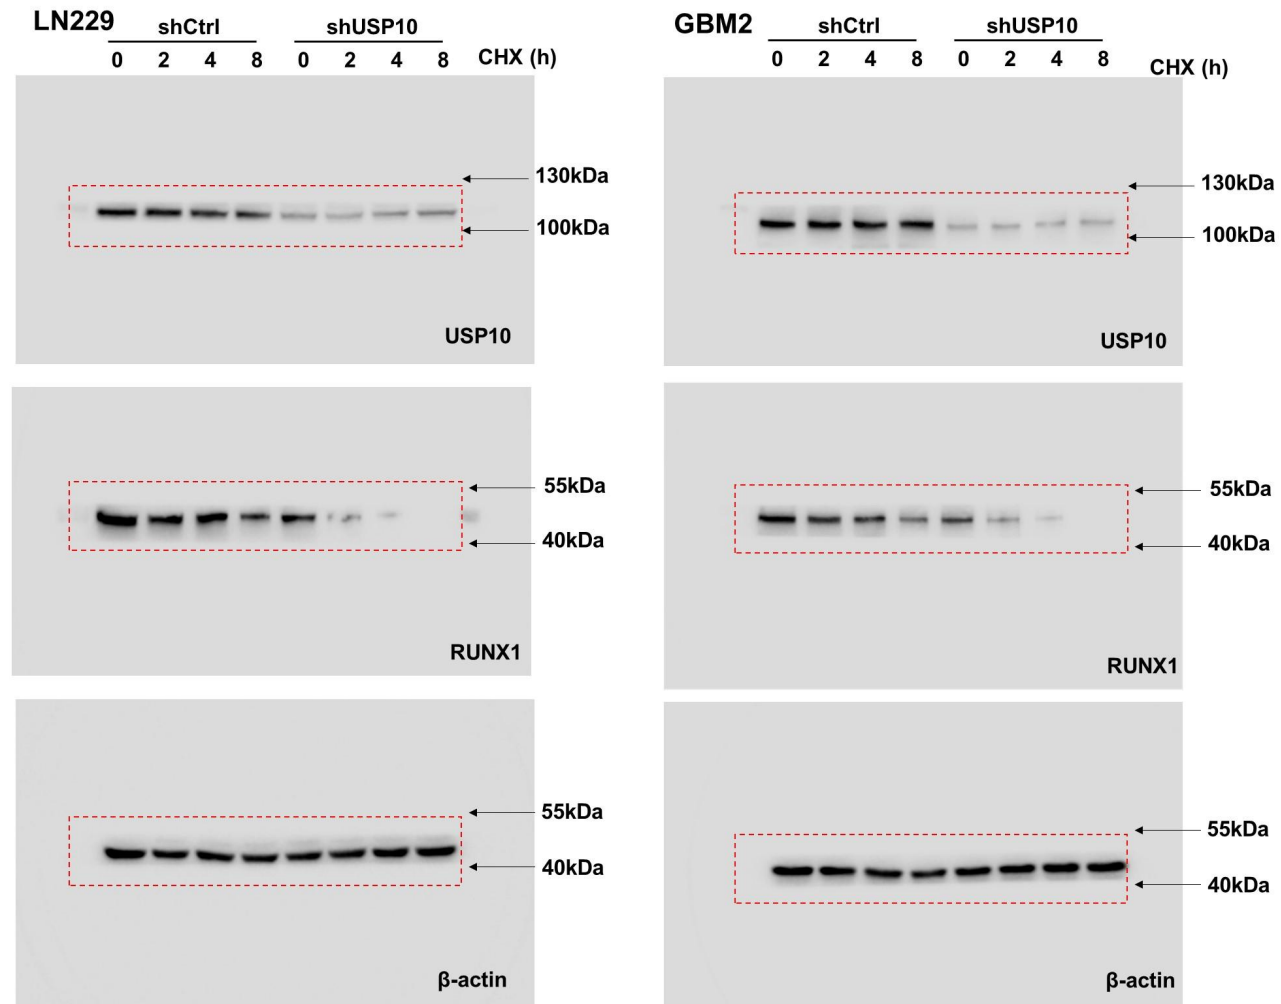

**Figure 5C**

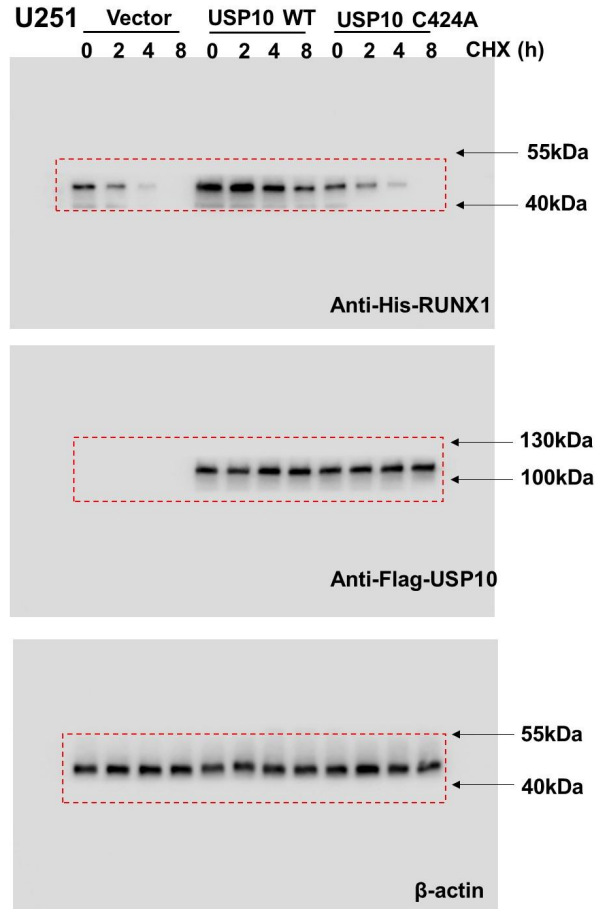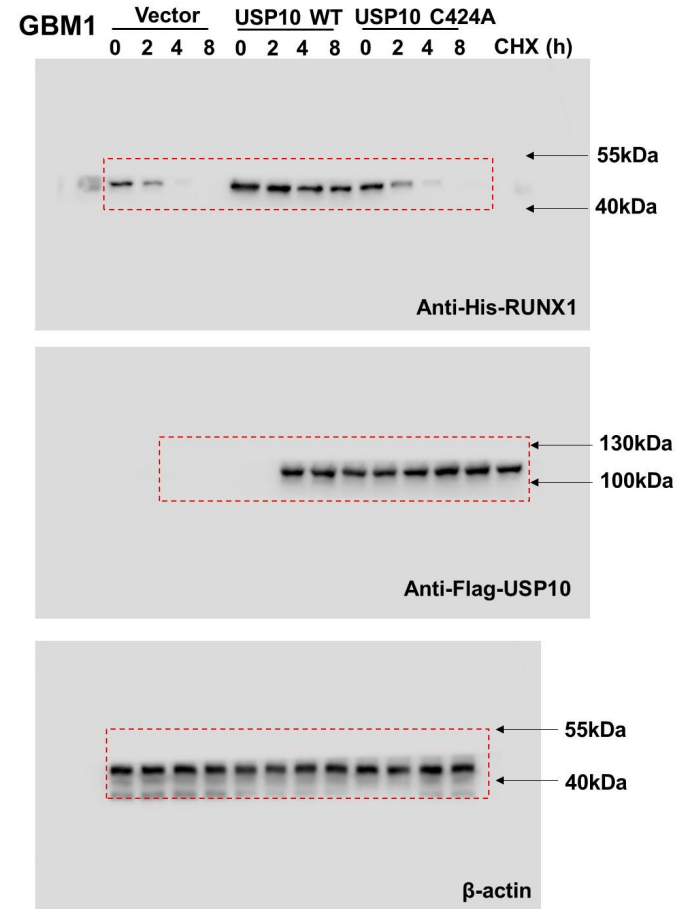

Figure 5D

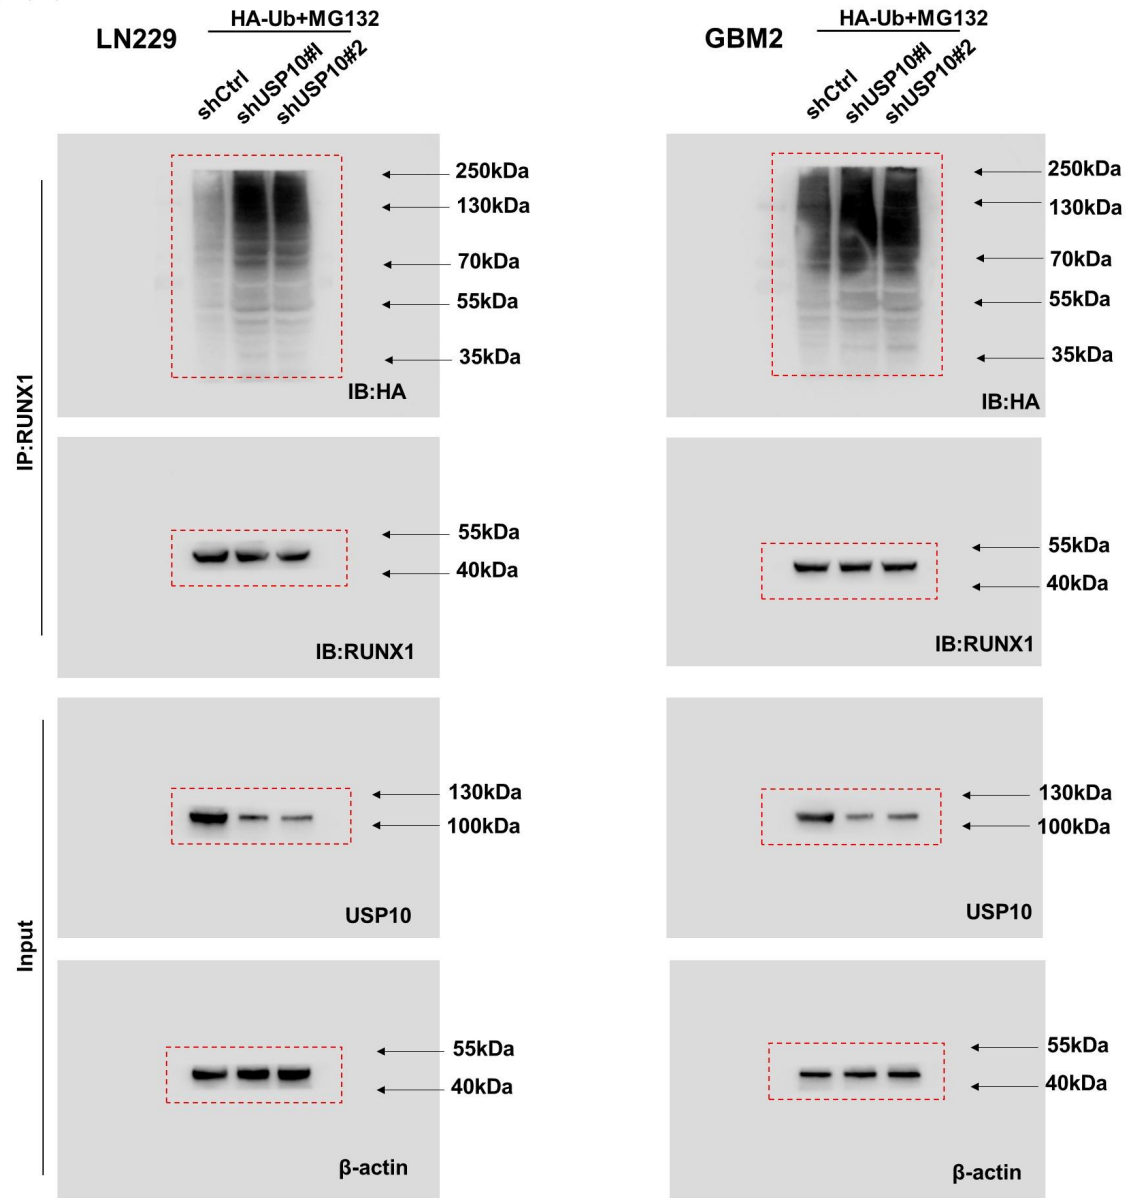

Figure 5E

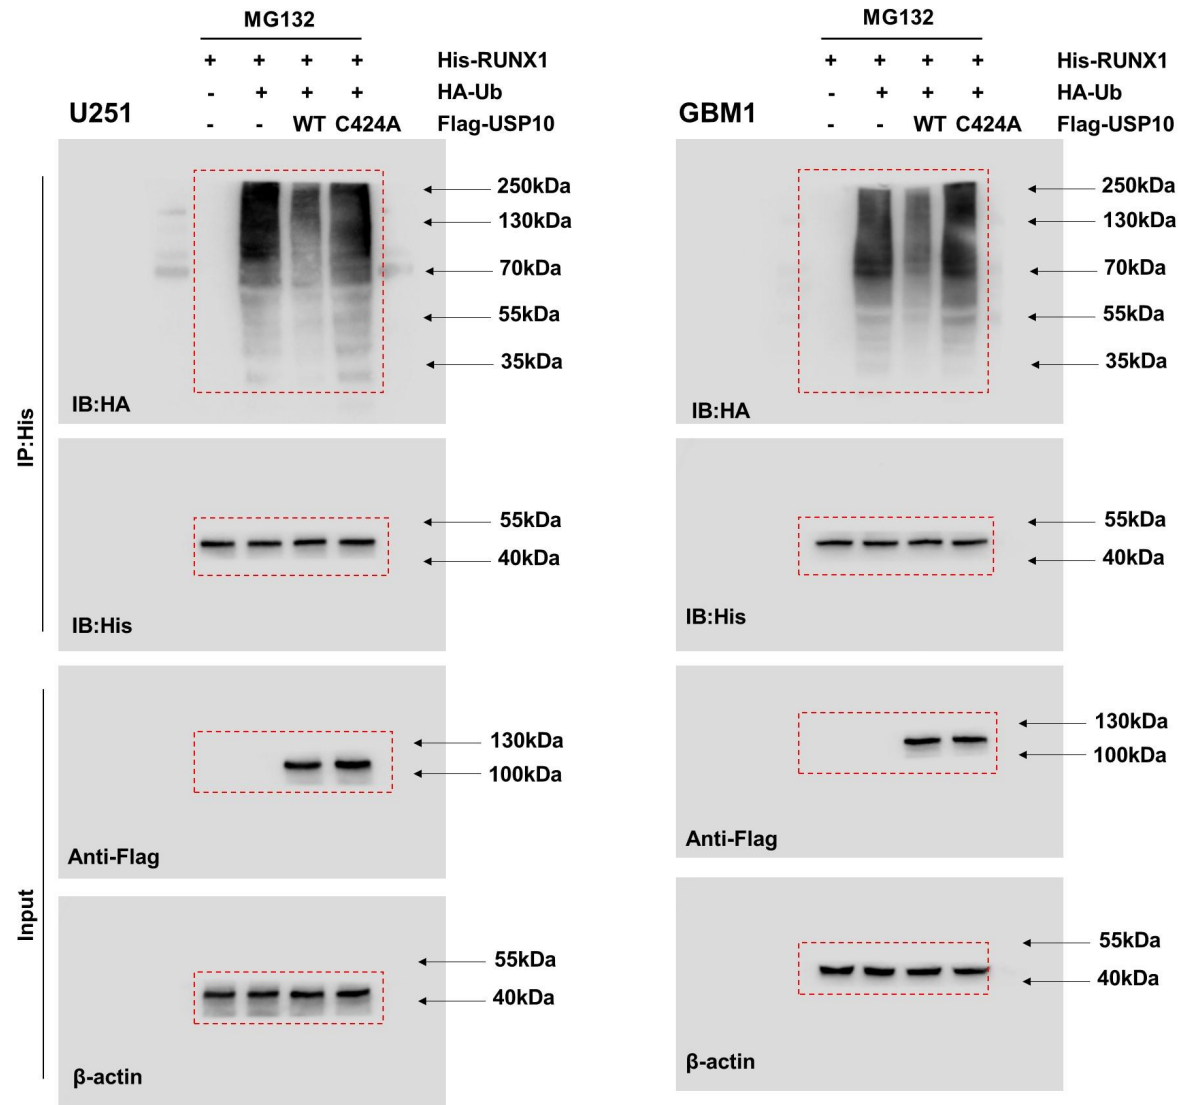

**Figure 5F**

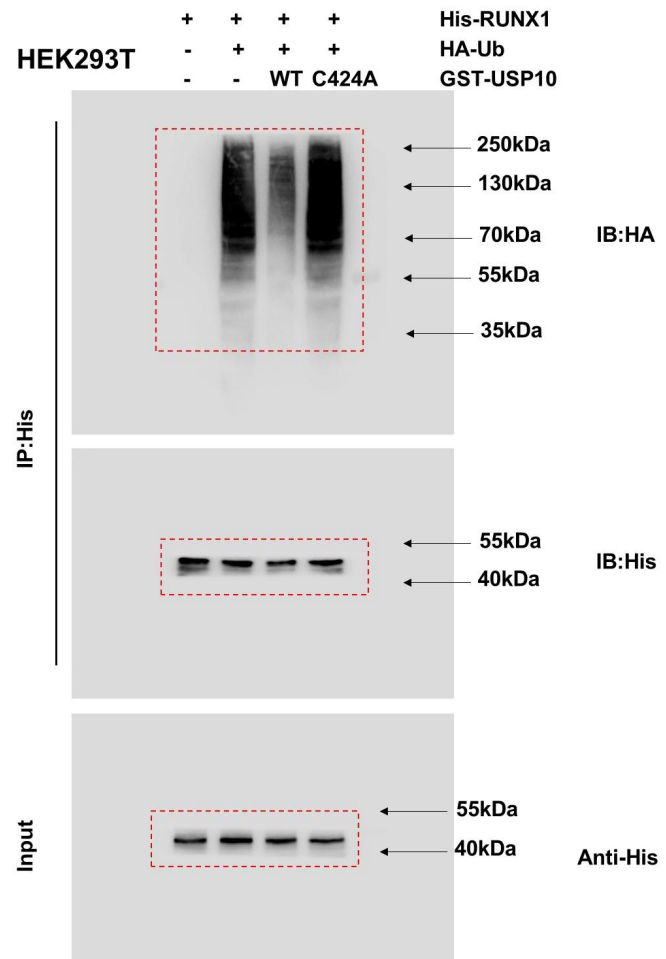

Figure 5G

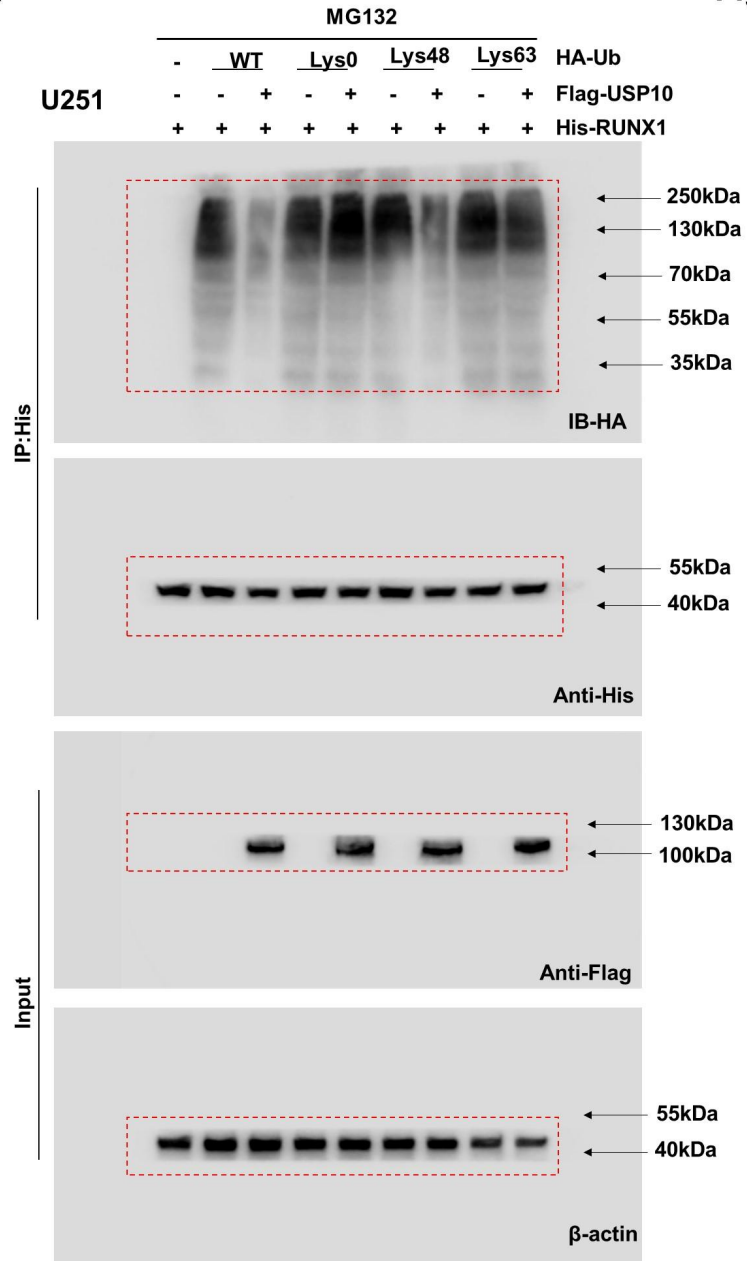

Figure 5H

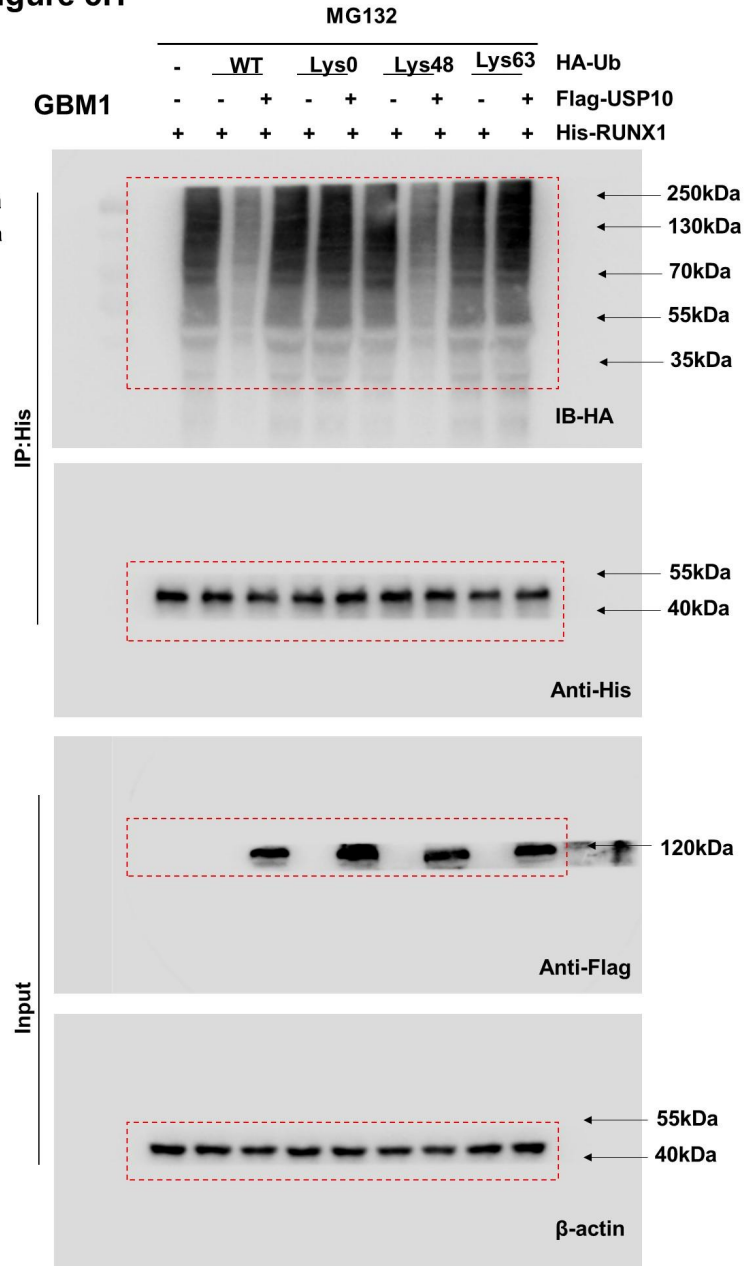

Figure 5I

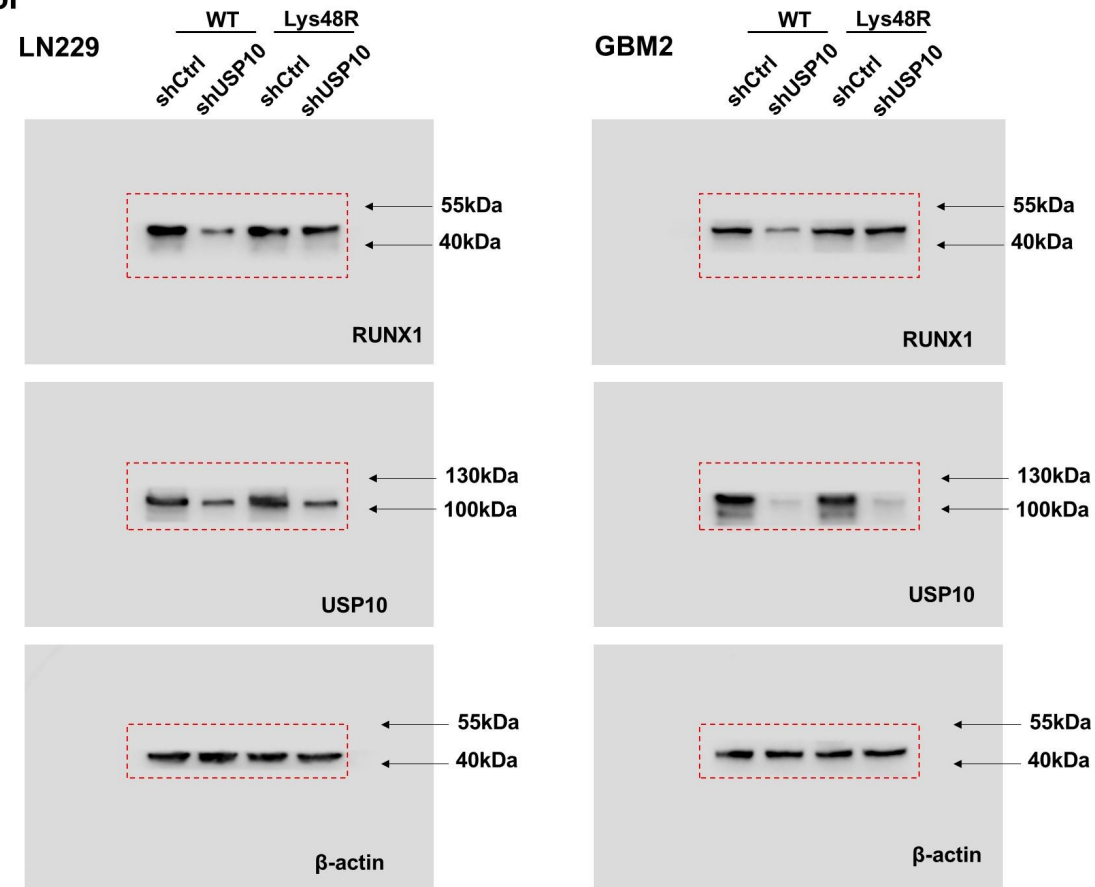



**Figure 6A**

|              |   |   |   |   |   |   |   |   |          |
|--------------|---|---|---|---|---|---|---|---|----------|
|              | + | - | - | - | + | - | - | - | shCtrl   |
|              | - | + | - | - | - | + | - | - | shUSP10  |
| <b>LN229</b> | - | - | - | + | - | - | - | + | Spatin-1 |
|              | - | - | - | - | + | + | + | + | MG132    |

|             |   |   |   |   |   |   |   |   |          |
|-------------|---|---|---|---|---|---|---|---|----------|
|             | + | - | - | - | + | - | - | - | shCtrl   |
|             | - | + | - | - | - | + | - | - | shUSP10  |
| <b>GBM2</b> | - | - | - | + | - | - | - | + | Spatin-1 |
|             | - | - | - | - | + | + | + | + | MG132    |

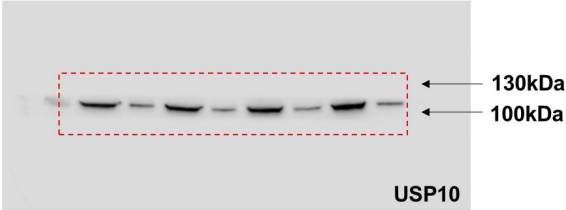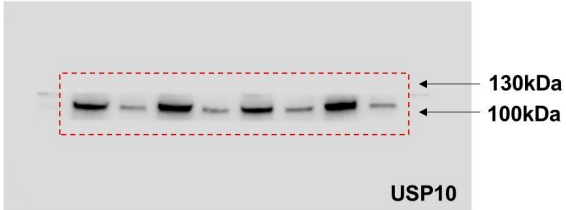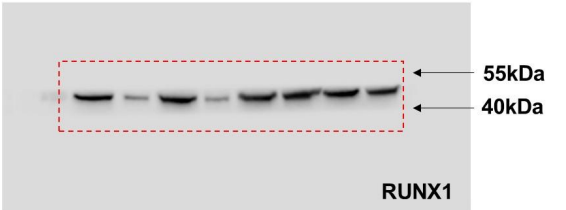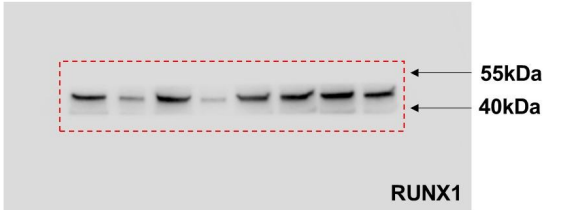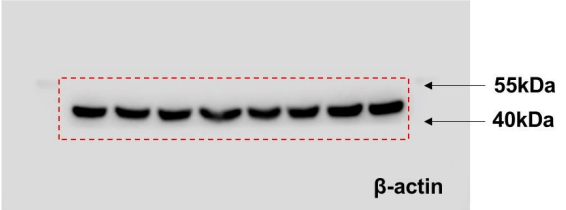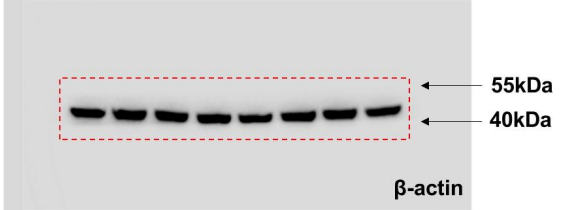

Figure 6B

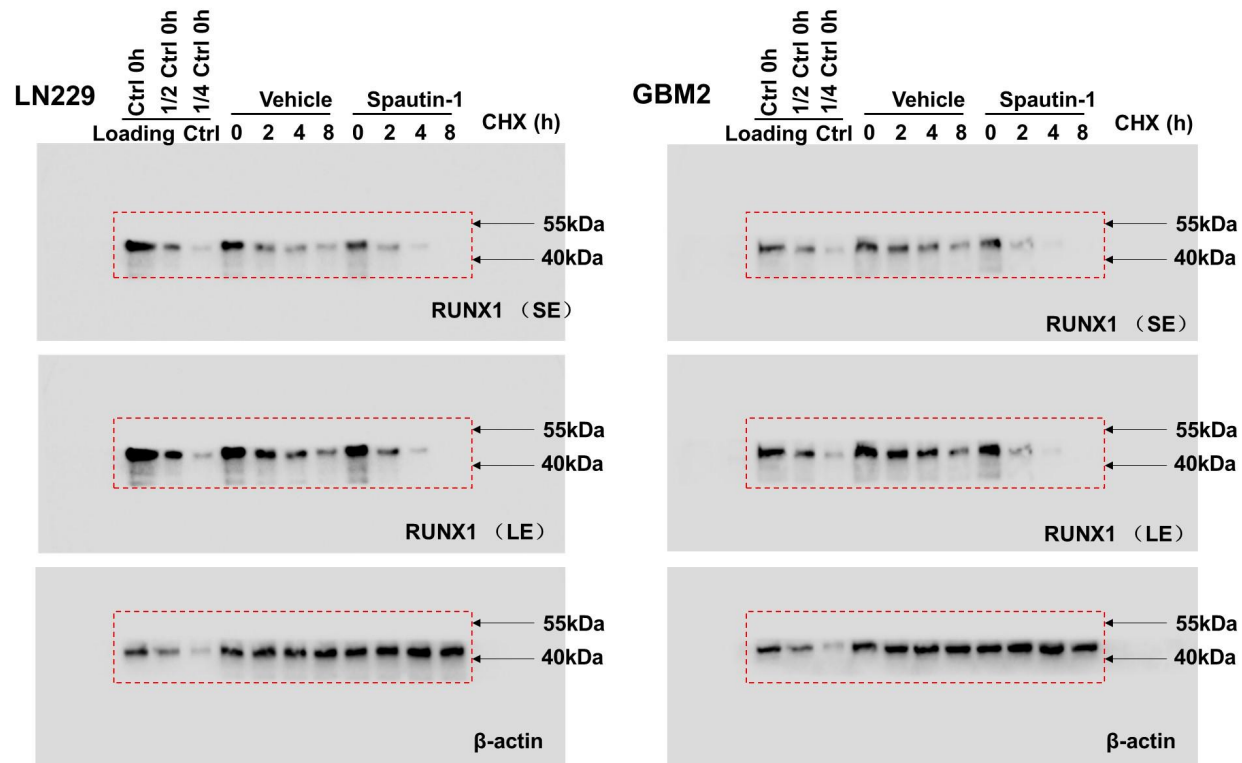

**Figure 6C**

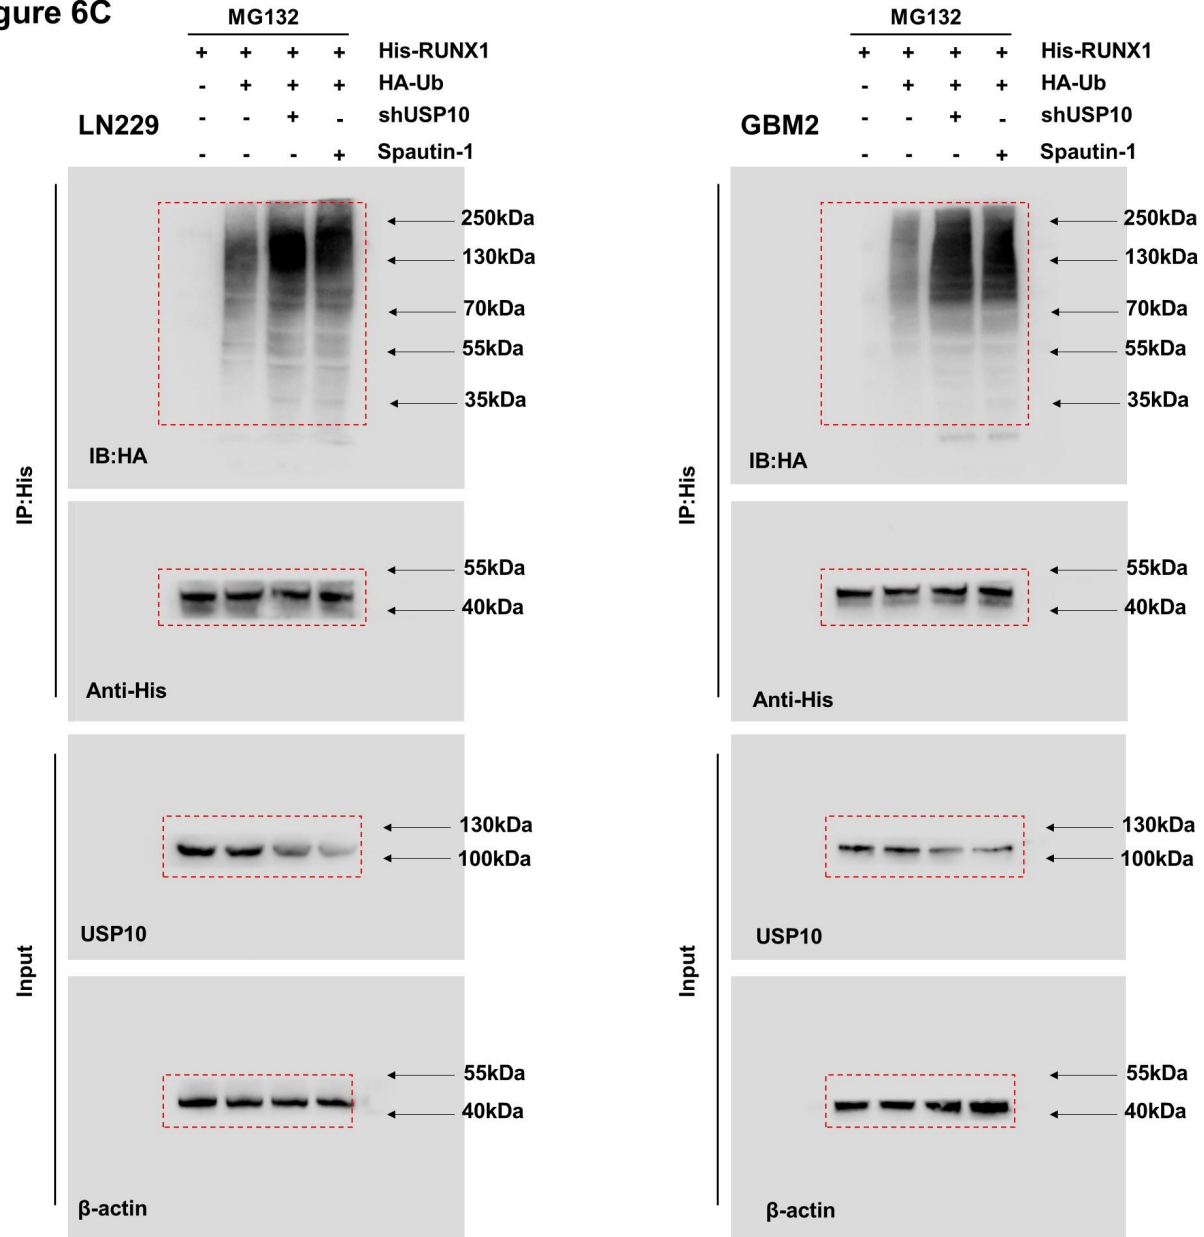

**Figure 6D**

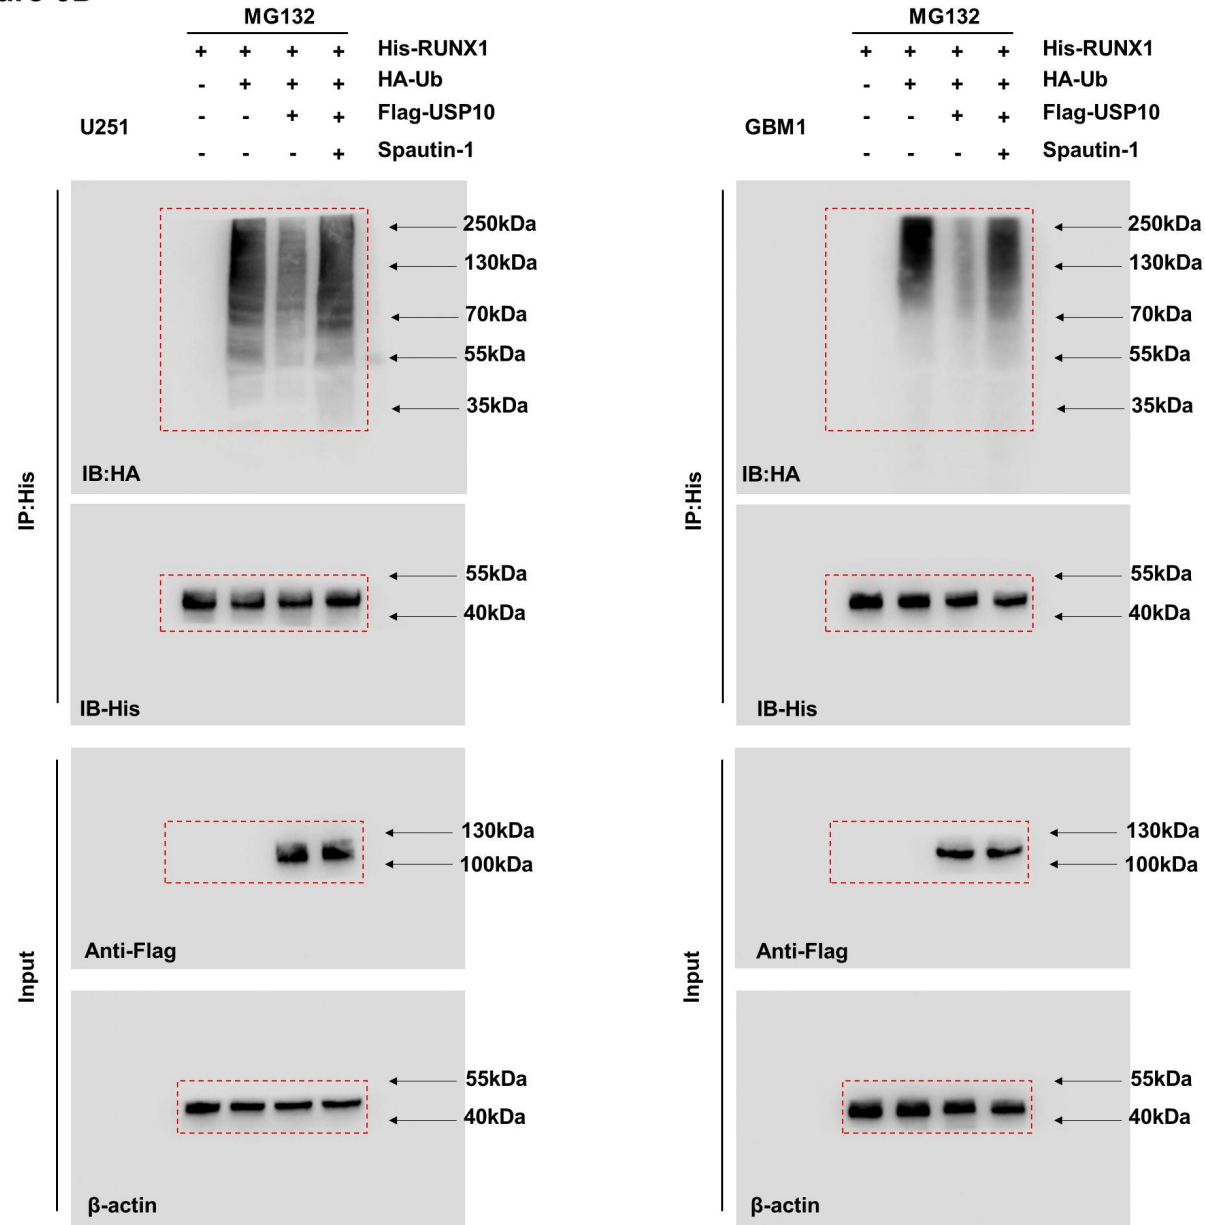

**Figure 6E**

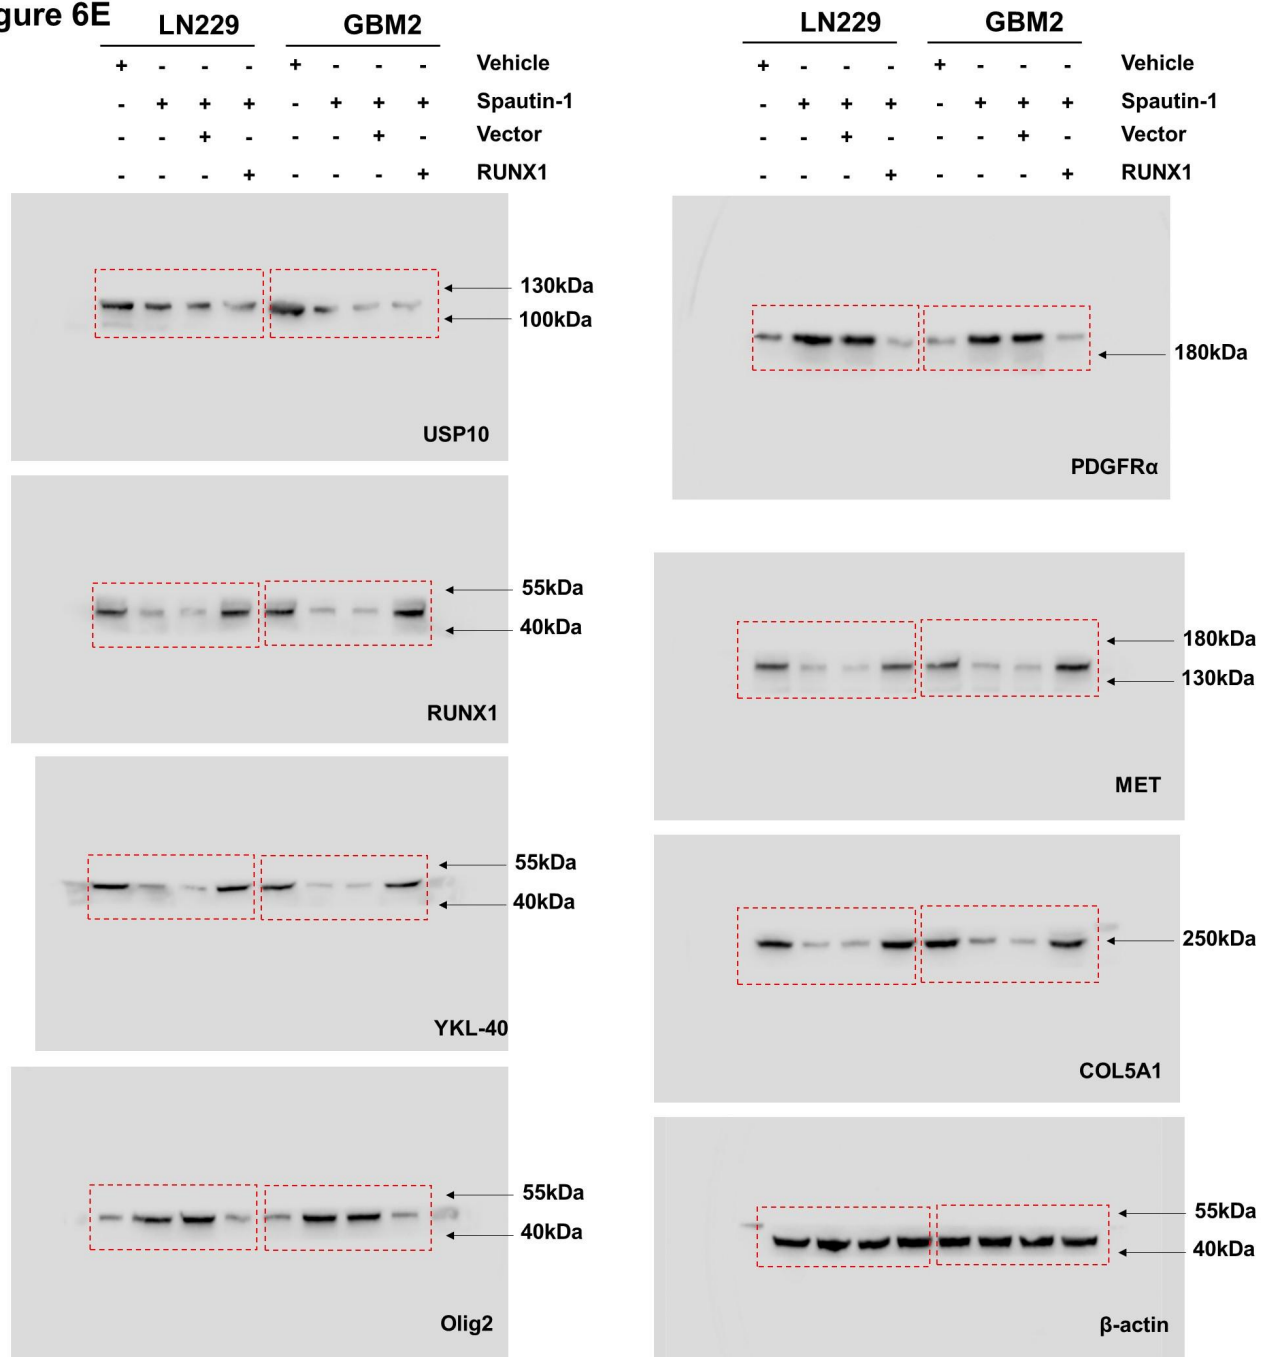

Figure 6F

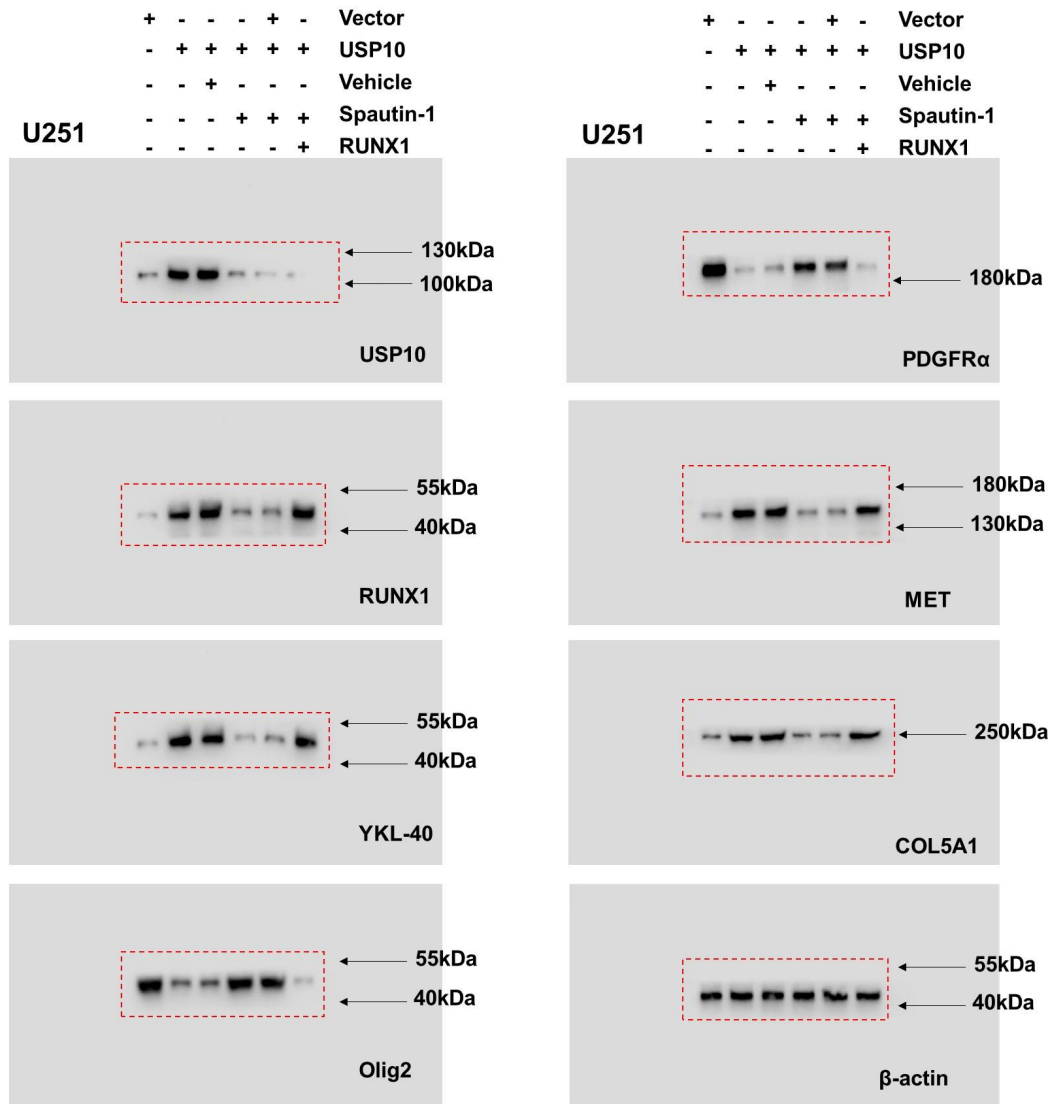

**Figure 6F**

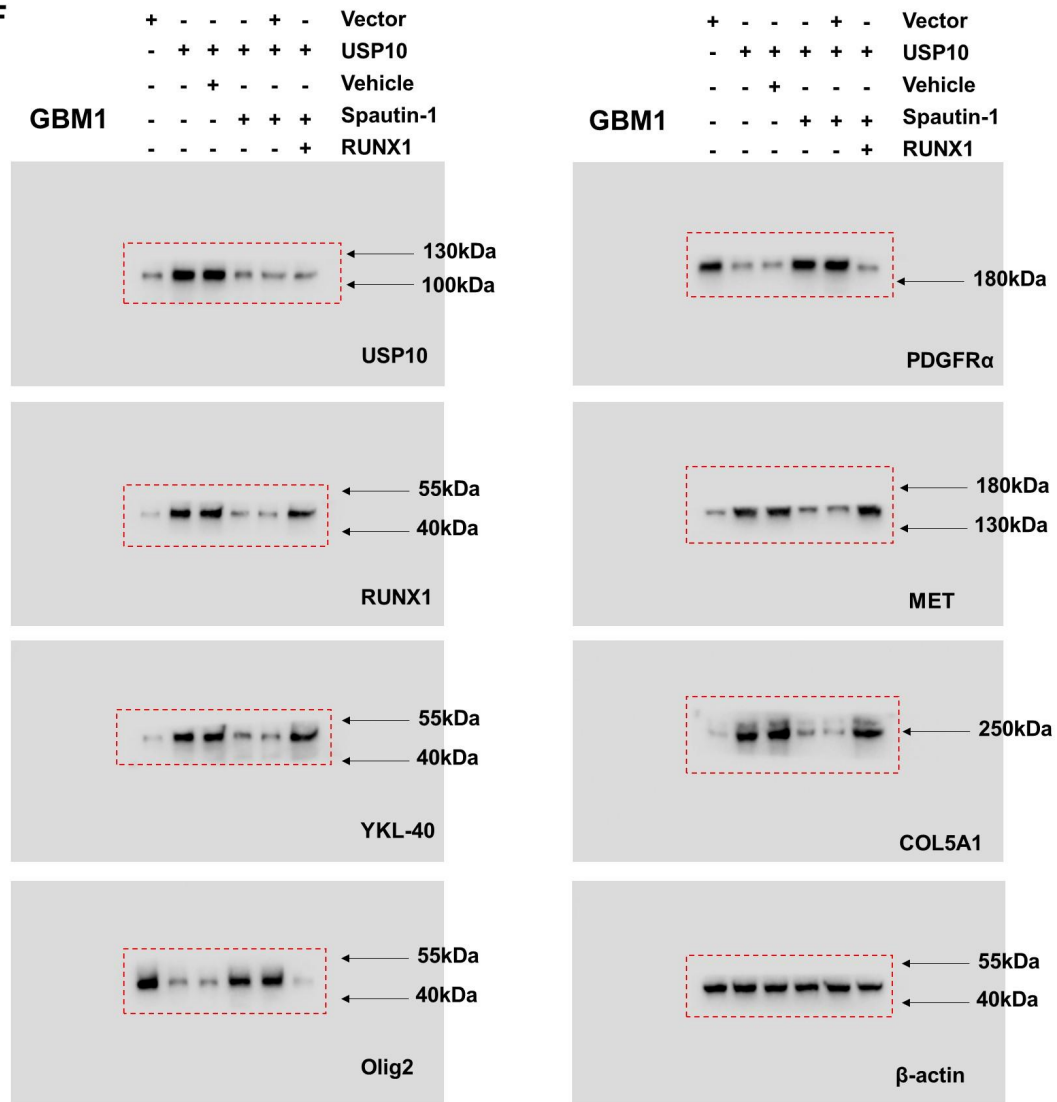

**Figure 7B**

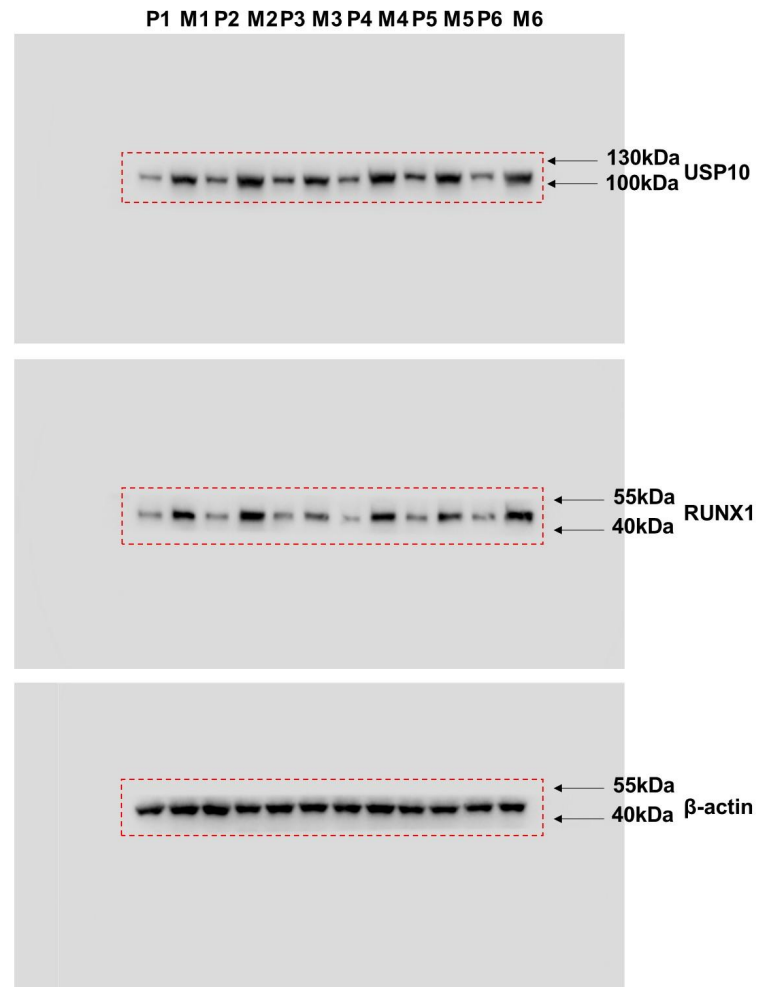



### Supplementary Figure 1A

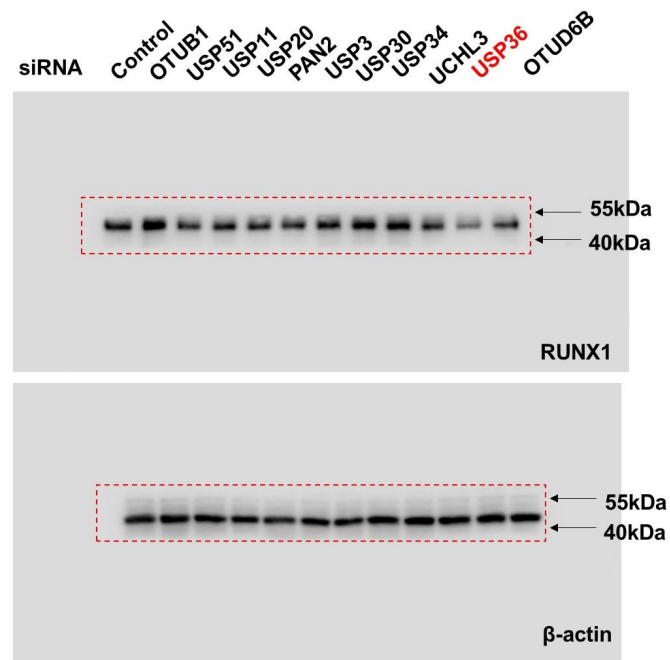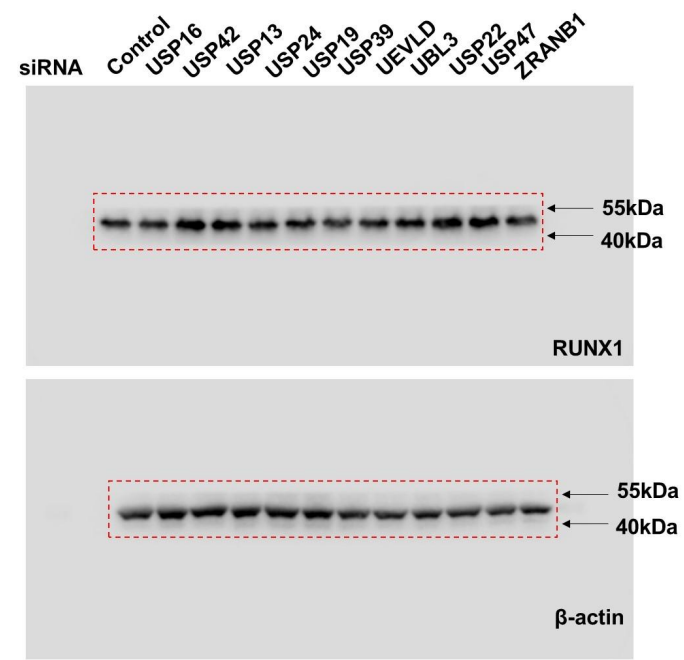

### Supplementary Figure 1A

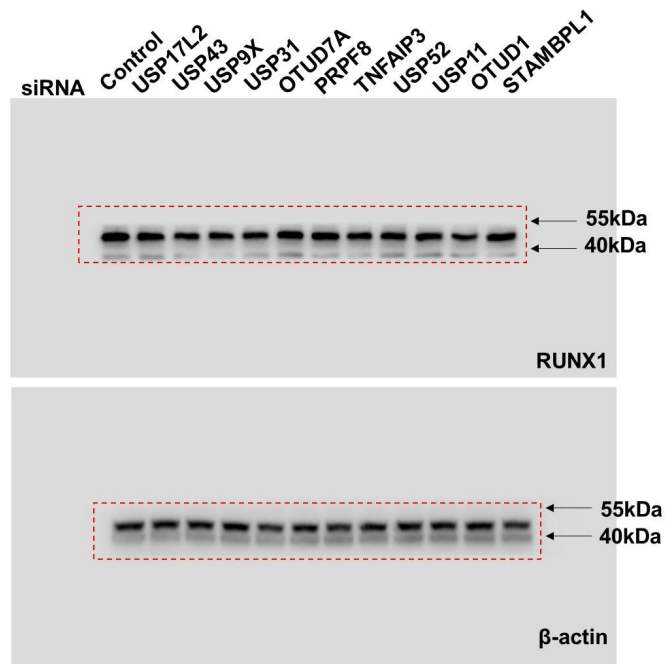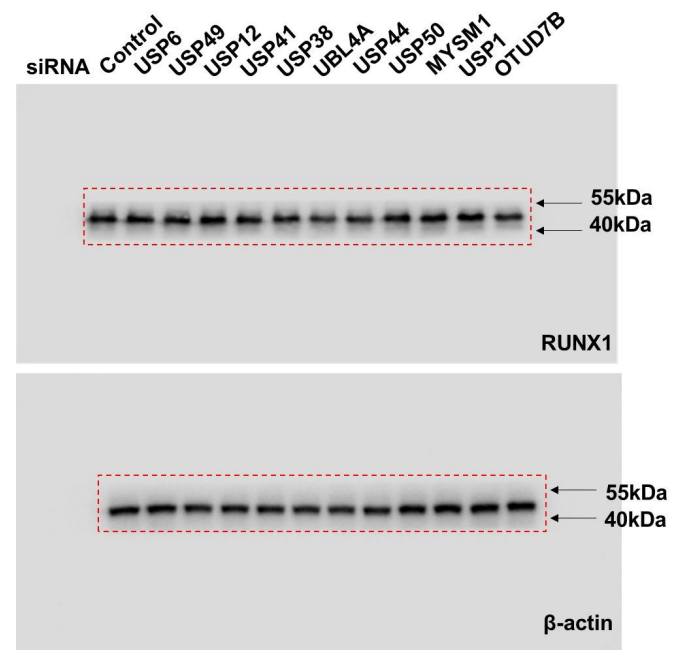

Supplementary Figure 1A

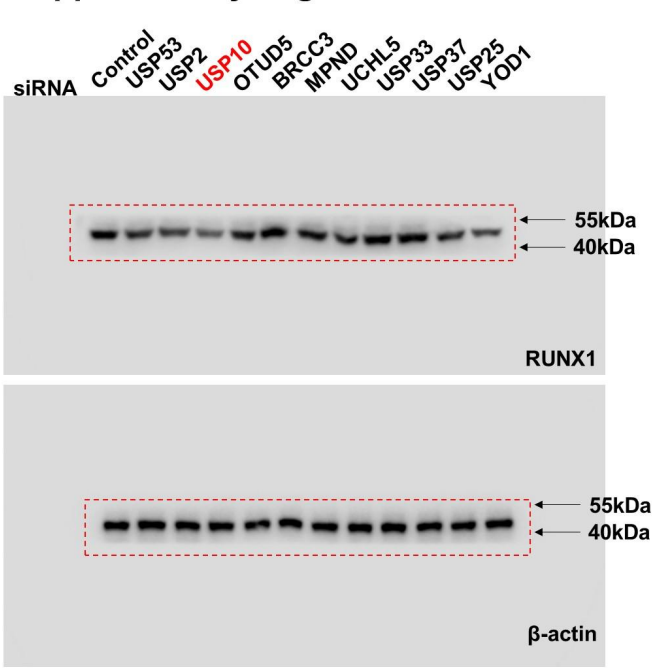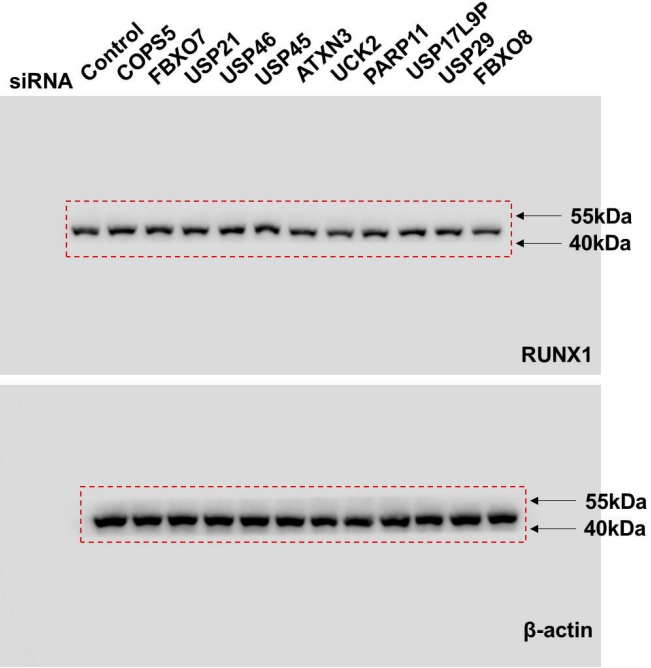

### Supplementary Figure 1A

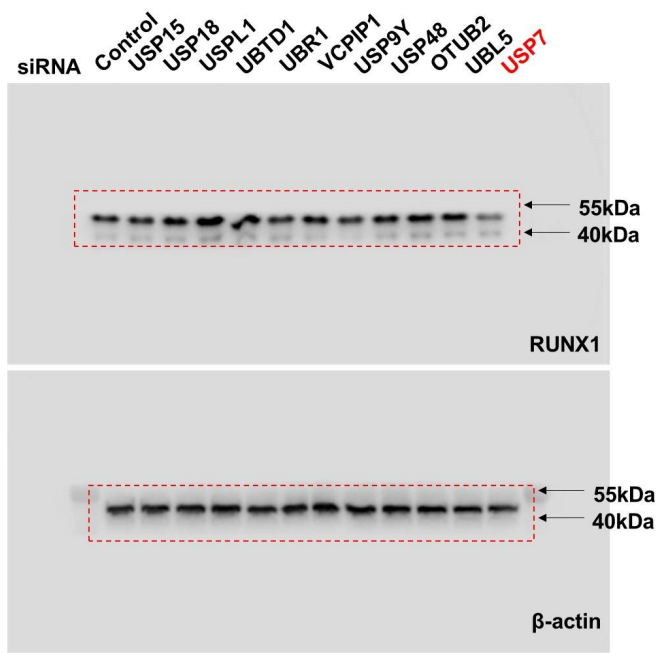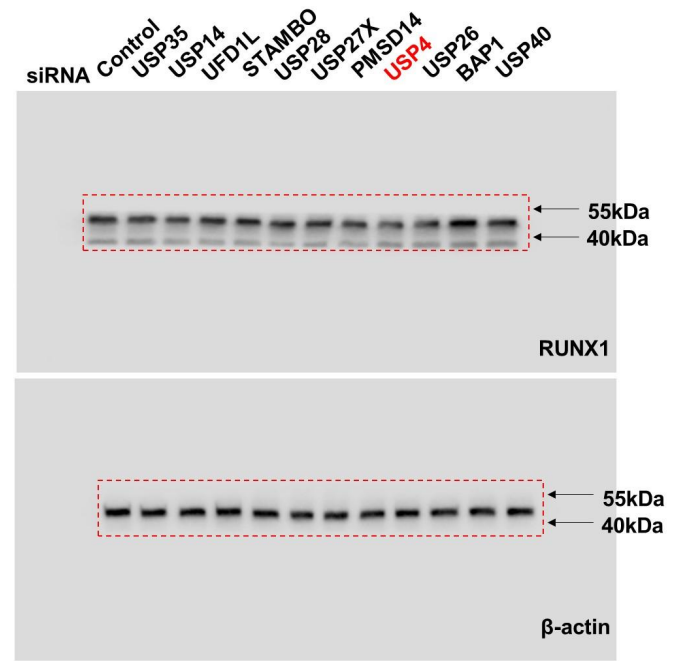



Supplementary  
Figure 2B

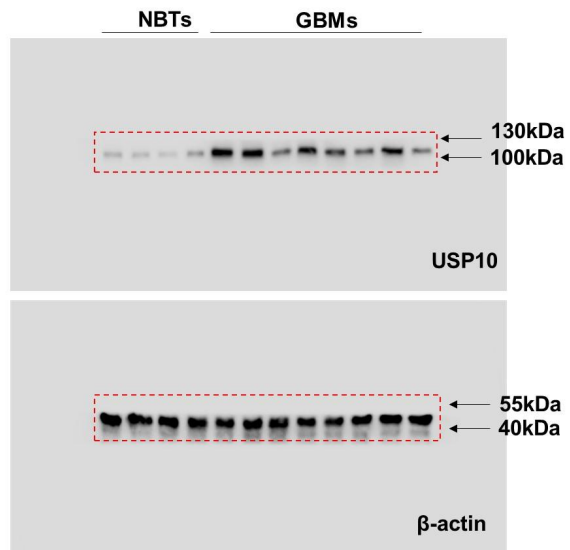

Supplementary  
Figure 2C

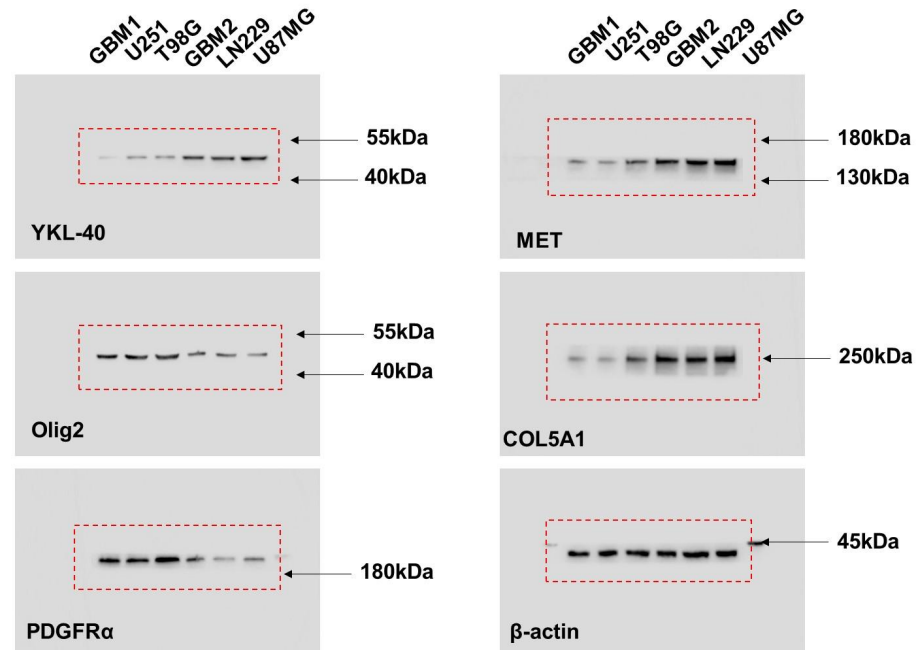

Supplement: 41419_2023_5734_MOESM10_ESM.pdf [file 41419_2023_5734_MOESM10_ESM.pdf]
